# Supplementary material for: Bioorthogonal Uncaging of the Active Metabolite of Irinotecan by Palladium‐Functionalized Microdevices
Source: PubMed Central journal article supplement (PMC6282958; doi:10.1002/chem.201803725), 2018-11-08
Supplement: CHEM-24-16783-s001.pdf [file CHEM-24-16783-s001.pdf]

# CHEMISTRY

## A **European** Journal

### Supporting Information

#### **Bioorthogonal Uncaging of the Active Metabolite of Irinotecan by Palladium-Functionalized Microdevices**

Catherine Adam,<sup>[a]</sup> Ana M. Pérez-López,<sup>[a]</sup> Lloyd Hamilton,<sup>[b]</sup> Belén Rubio-Ruiz,<sup>[a]</sup>  
Thomas L. Bray,<sup>[a]</sup> Dirk Sieger,<sup>[a, b]</sup> Paul M. Brennan,<sup>\*,[a, c]</sup> and Asier Unciti-Broceta<sup>\*,[a]</sup>

chem\_201803725\_sm\_miscellaneous\_information.pdf

## Supporting Information

### **Bioorthogonal Uncaging of the Active Metabolite of Irinotecan by Palladium-Functionalized Microdevices**

Catherine Adam, Ana M. Pérez-López, Lloyd Hamilton, Belén Rubio-Ruiz, Thomas L. Bray, Dirk Sieger, Paul M. Brennan\* and Asier Unciti-Broceta\*

## LIST OF CONTENTS

|                                                                                                                    |     |
|--------------------------------------------------------------------------------------------------------------------|-----|
| 1. Synthesis and characterization of compounds <b>2a</b> , <b>2b</b> , <b>2d</b> , <b>4</b> , and <b>5-9</b> ..... | S3  |
| 2. NMR spectra of <b>2a-d</b> .....                                                                                | S6  |
| 3. Synthesis and characterization of Pd-microdevices .....                                                         | S10 |
| 4. Non-biological conversion studies in vitro.....                                                                 | S10 |
| 5. Cell culture .....                                                                                              | S11 |
| Cytotoxicity dose-response curves .....                                                                            | S11 |
| Prodrug-into-drug conversion studies – monotherapy activation.....                                                 | S11 |
| Prodrug-into-drug conversion studies – dual therapy activation.....                                                | S11 |
| Prodrug-into-drug conversion studies – delayed dual therapy activation .....                                       | S12 |
| <b>Table S1</b> : Calculated EC <sub>50</sub> ±SD values for all cell lines / nM.....                              | S12 |
| 6. Supplementary Figures.....                                                                                      | S13 |
| 7. References.....                                                                                                 | S19 |

## 1. Synthesis and characterization of compounds 2a, 2b, 2d, 4, and 5-9

**Synthesis of 2a.** 20 mg scale, DMF, rt, purified 3% MeOH/CH<sub>2</sub>Cl<sub>2</sub> to yield an off-white solid (14 mg, 64%). <sup>1</sup>H NMR (500 MHz, DMSO-*d*<sub>6</sub>) δ 8.11 (d, *J* = 9.2 Hz, 1H), 7.63 (d, *J* = 2.8 Hz, 1H), 7.55 (dd, *J* = 9.2, 2.8 Hz, 1H), 6.51 (s, 1H), 5.43 (d, *J* = 2.1 Hz, 2H), 5.31 (s, 2H), 5.08 (d, *J* = 2.4 Hz, 2H), 3.65 (t, *J* = 2.4 Hz, 1H), 3.20 (q, *J* = 7.5 Hz, 2H), 1.87 (m, 2H), 1.34 (t, *J* = 7.5 Hz, 3H), 0.88 (t, *J* = 7.3 Hz, 3H); <sup>13</sup>C NMR (126 MHz, DMSO-*d*<sub>6</sub>) δ 173.0, 157.3, 156.4, 150.6, 150.4, 146.7, 145.1, 144.6, 132.0, 128.9, 128.1, 122.8, 118.8, 104.6, 96.6, 79.3, 79.2, 72.9, 65.7, 56.4, 50.0, 30.7, 22.8, 14.0, 8.2; HRMS (ESI<sup>+</sup>) *m/z* [M+H]<sup>+</sup> calcd for C<sub>25</sub>H<sub>23</sub>N<sub>2</sub>O<sub>5</sub>: 431.1601; found: 431.1597. Purity: 100% (UPLC, method 1).

**Synthesis of 2b.** 28 mg scale, DMF, rt, purified 2.5% MeOH/ CH<sub>2</sub>Cl<sub>2</sub> to yield off-white solid (2.5 mg, 5%). <sup>1</sup>H NMR (500 MHz, DMSO-*d*<sub>6</sub>) δ 8.09 (d, *J* = 9.2 Hz, 1H), 7.60 (d, *J* = 2.7 Hz, 1H), 7.56 (dd, *J* = 9.2, 2.7 Hz, 1H), 7.53 – 7.48 (m, 2H), 7.27 (s, 1H), 7.06 – 7.01 (m, 2H), 6.48 (s, 1H), 5.42 (d, *J* = 1.3 Hz, 2H), 5.31 (s, 2H), 5.29 (s, 2H), 4.81 (d, *J* = 2.4 Hz, 2H), 3.56 (t, *J* = 2.4 Hz, 1H), 3.19 (q, *J* = 7.6, 2H), 1.86 (m, 2H), 1.28 (t, *J* = 7.6 Hz, 3H), 0.88 (t, *J* = 7.3 Hz, 4H); <sup>13</sup>C NMR (126 MHz, DMSO-*d*<sub>6</sub>) δ 173.0, 157.7, 157.5, 157.3, 150.5, 150.1, 146.8, 144.9, 144.4, 131.9, 130.2, 129.8, 128.9, 128.3, 123.2, 118.7, 115.3, 104.2, 96.5, 79.7, 78.7, 72.9, 70.0, 65.7, 55.9, 50.0, 30.7, 22.7, 13.4, 8.2; HRMS (ESI<sup>+</sup>) *m/z* [M+H]<sup>+</sup> calcd for C<sub>32</sub>H<sub>29</sub>N<sub>2</sub>O<sub>6</sub>: 537.2020; found: 537.2025. Purity: 97% (UPLC, method 1).

**Synthesis of 2d.** 20 mg scale, MeCN, μw, purified 4% MeOH/ CH<sub>2</sub>Cl<sub>2</sub> to yield a yellow solid (14 mg, 54%). <sup>1</sup>H NMR (500 MHz, DMSO-*d*<sub>6</sub>) δ 8.11 (d, *J* = 9.2 Hz, 1H), 7.71 (d, *J* = 2.8 Hz, 1H), 7.57 (dd, *J* = 9.2, 2.8 Hz, 1H), 7.29 (s, 1H), 7.20 (dd, *J* = 8.1, 7.6 Hz, 1H), 7.12 (d, *J* = 7.6 Hz, 2H), 6.49 (s, 1H), 5.44 (s, 2H), 5.33 (s, 4H), 3.24 (q, *J* = 7.6 Hz, 2H), 2.40 (s, 6H), 1.88 (m, 2H), 1.35 (t, *J* = 7.6 Hz, 3H), 0.89 (t, *J* = 7.3 Hz, 3H); <sup>13</sup>C NMR (126 MHz, DMSO-*d*<sub>6</sub>) δ 172.5, 157.8, 156.8, 150.1, 149.6, 146.3, 144.5, 144.0, 137.9, 132.5, 131.5, 128.5, 128.4, 128.1, 127.9, 122.5, 118.2, 103.4, 96.0, 72.4, 65.2, 65.1, 49.5, 30.2, 22.2, 19.3, 13.5, 7.8; HRMS (ESI<sup>+</sup>) *m/z* [M+H]<sup>+</sup> calcd for C<sub>31</sub>H<sub>31</sub>N<sub>2</sub>O<sub>5</sub>: 511.2228; found: 511.2208. Purity: 98% (UPLC, method 1).

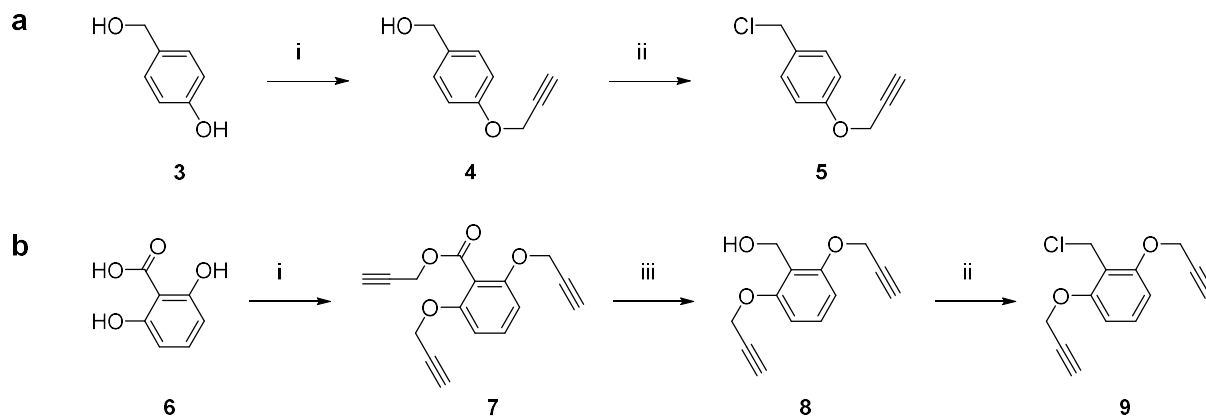

**Scheme S1.** Synthesis of alkyl halides **5** and **9**. *Reagents and conditions:* (i) Propargyl bromide,  $K_2CO_3$ , DMF or acetone, rt or reflux, overnight; (ii) cyanuric chloride, DMF, 1 h, rt, then; benzyl alcohol **4** or **8**,  $CH_2Cl_2$ , rt, overnight. (iii)  $LiAlH_4$ , THF, 0 °C to rt, overnight.

**4-Propargyloxybenzyl alcohol (4)** was synthesized as previously published<sup>[1]</sup>

**Synthesis of 4-Propargyloxybenzyl chloride (5).** Method derived from De Luca et al.<sup>[2]</sup> Cyanuric chloride (663 mg, 3.67 mmol) was stirred as a suspension in DMF (700  $\mu$ L) for 1 hr, after which *p*-propargyloxybenzyl alcohol (542 mg, 3.34 mmol) in  $CH_2Cl_2$  (5 mL) was added and the reaction stirred at ambient temperature overnight. The reaction was diluted with  $CH_2Cl_2$  (25 mL) and washed with sat. bicarb. The organic phase was extracted with  $CH_2Cl_2$  (2  $\times$  15 mL), dried over  $MgSO_4$  and concentrated *in vacuo*. The crude product was further purified with column chromatography (20-60% EtOAc/*n*-hexane) to yield the title compound as a colourless oil (501 mg, 2.77 mmol, 83%).  $^1H$  NMR (500 MHz,  $CDCl_3$ )  $\delta$  7.33 (d,  $J$  = 8.6 Hz, 2H), 6.96 (d,  $J$  = 8.7 Hz, 2H), 4.69 (d,  $J$  = 2.4 Hz, 2H), 4.56 (s, 2H), 2.52 (t,  $J$  = 2.4 Hz, 1H);  $^{13}C$  NMR (126 MHz,  $CDCl_3$ )  $\delta$  157.7, 130.8, 130.2, 115.3, 78.5, 75.8, 56.0, 46.2.

**Synthesis of propargyl 2,6-bis(propargyloxy)benzoate (7).** 2,6-Dihydroxybenzoic acid (6.96 g, 45 mmol) and potassium carbonate (30.5 g, 220 mmol) were suspended in dry DMF (40 mL) and stirred for 30 min at 0 °C. Propargyl bromide (21 mL, 80% v/v in toluene, 141 mmol) was added dropwise and the reaction was warmed to ambient temperature and stirred for 3 d. The reaction was diluted with water (300 mL) and extracted with diethyl ether (6  $\times$  200 mL). The combined organic phases were washed with brine, dried over anhydrous  $MgSO_4$  and concentrated *in vacuo* to yield the title compound as a brown oil (5.37 g, 20.1 mmol, 44%), used without further purification.  $^1H$  NMR (400 MHz,  $CDCl_3$ )  $\delta$  7.32 (t,  $J$  = 8.4 Hz, 1H), 6.76 (d,  $J$  = 8.4 Hz, 2H), 4.91 (d,  $J$  = 2.5 Hz, 2H), 4.71 (d,  $J$  = 2.5 Hz, 4H), 2.51 (t,  $J$  = 2.4 Hz, 2H), 2.50 (t,  $J$  = 2.5 Hz, 1H);  $^{13}C$  NMR (126 MHz,  $CDCl_3$ )  $\delta$  165.1, 155.9, 131.3, 114.0, 106.8, 78.2, 77.7, 76.2, 75.2, 57.0, 52.9.

**Synthesis of 2,6-bis(propargyloxy)benzyl alcohol (8).** Intermediate **7** (5.37 g, 20 mmol) was dissolved in THF and cooled to 0 °C for the addition of LiAlH<sub>4</sub> (1 M in THF, 24 mL) before warming to ambient temperature and stirring overnight. The reaction was quenched at 0 °C with 10% NaOH (40 mL), stirring for 30 min. The aqueous phase was extracted with CH<sub>2</sub>Cl<sub>2</sub> (3 × 70 mL) and the combined organic phases washed with brine (40 mL), dried over anhydrous MgSO<sub>4</sub> and concentrated *in vacuo*. The crude alcohol was purified by flash column chromatography (30% EtOAc/*n*-hexane) to yield the title compound as a white solid (2.74 g, 12.6 mmol, 63%). <sup>1</sup>H NMR (500 MHz, CDCl<sub>3</sub>) δ 7.24 (t, *J* = 8.4 Hz, 1H), 6.72 (d, *J* = 8.4 Hz, 2H), 4.81 (d, *J* = 6.7 Hz, 2H), 4.74 (d, *J* = 2.4 Hz, 4H), 2.51 (t, *J* = 2.4 Hz, 2H), 2.37 (t, *J* = 6.7 Hz, 1H); <sup>13</sup>C NMR (126 MHz, CDCl<sub>3</sub>) δ 162.5, 155.7, 129.1, 106.6, 78.5, 75.8, 56.6, 54.4; HRMS (ESI<sup>+</sup>) *m/z* [M+H]<sup>+</sup> calcd for C<sub>13</sub>H<sub>13</sub>O<sub>3</sub>: 217.0865, found: 217.0859.

**Synthesis of 2,6-bis(propargyloxy)benzyl chloride (9).** Cyanuric chloride (180 mg, 1.00 mmol) was stirred as a suspension in DMF (0.1 mL) for 1 h. Intermediate **8** (194 mg, 0.90 mmol) in CH<sub>2</sub>Cl<sub>2</sub> (1 mL) was added and the reaction stirred at ambient temperature overnight. The reaction was diluted with CH<sub>2</sub>Cl<sub>2</sub> (25 mL) and washed with a saturated NaHCO<sub>3</sub> solution. The organic phase was extracted with CH<sub>2</sub>Cl<sub>2</sub> (2 × 15 mL), dried over anhydrous MgSO<sub>4</sub> and concentrated *in vacuo*. The crude product was purified with column chromatography (40% EtOAc/*n*-hexane) to yield the title compound as a white solid (161 mg, 77%). <sup>1</sup>H NMR (500 MHz, CDCl<sub>3</sub>) 7.28 (t, *J* = 8.4 Hz, 1H), 6.72 (d, *J* = 8.4 Hz, 2H), 4.78 (d, *J* = 2.3 Hz, 4H), 4.78 (s, 2H), 2.51 (t, *J* = 2.4 Hz, 2H); <sup>13</sup>C NMR (126 MHz, CDCl<sub>3</sub>) δ 156.7, 123.0, 115.9, 106.2, 78.4, 75.7, 56.6, 35.3.

## 2. NMR spectra of 2a-d

### <sup>1</sup>H NMR spectra of 2a in DMSO-d<sub>6</sub> at 300 K

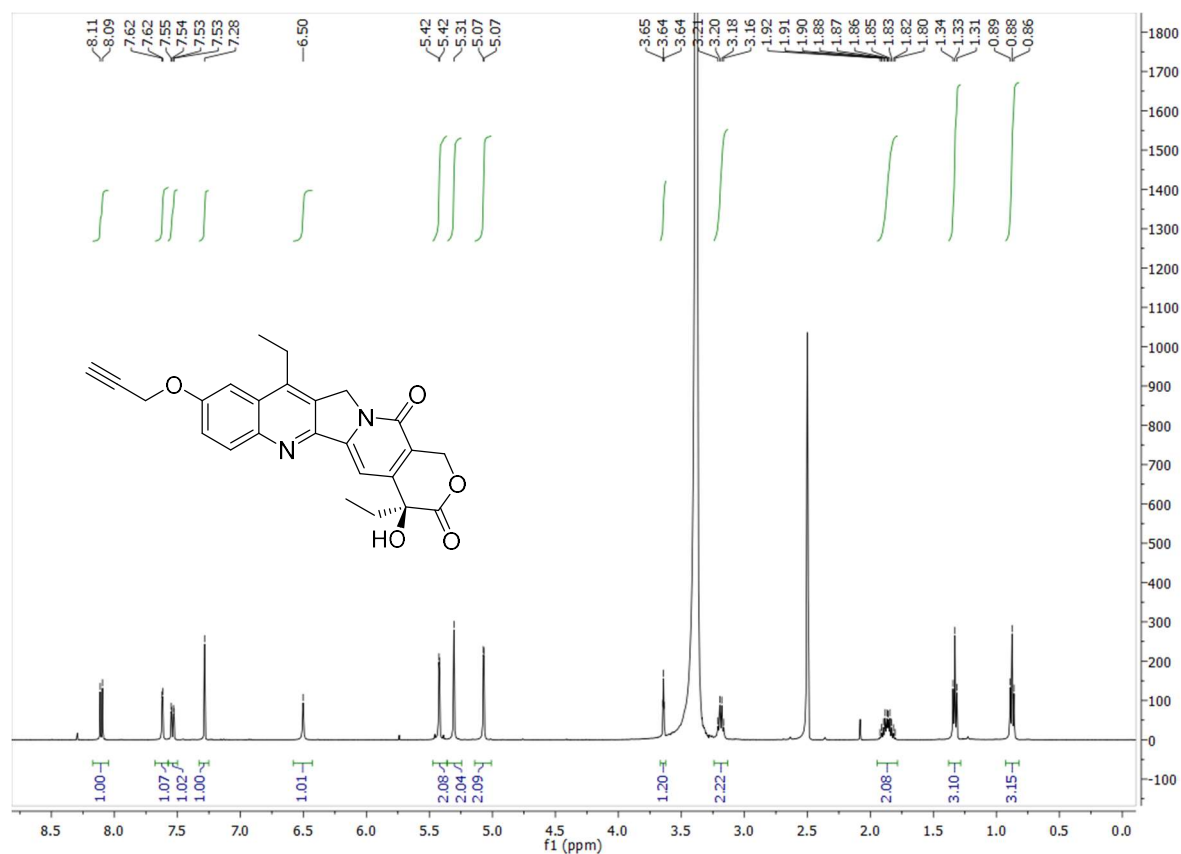

### <sup>13</sup>C NMR spectra of 2a in DMSO-d<sub>6</sub> at 300 K

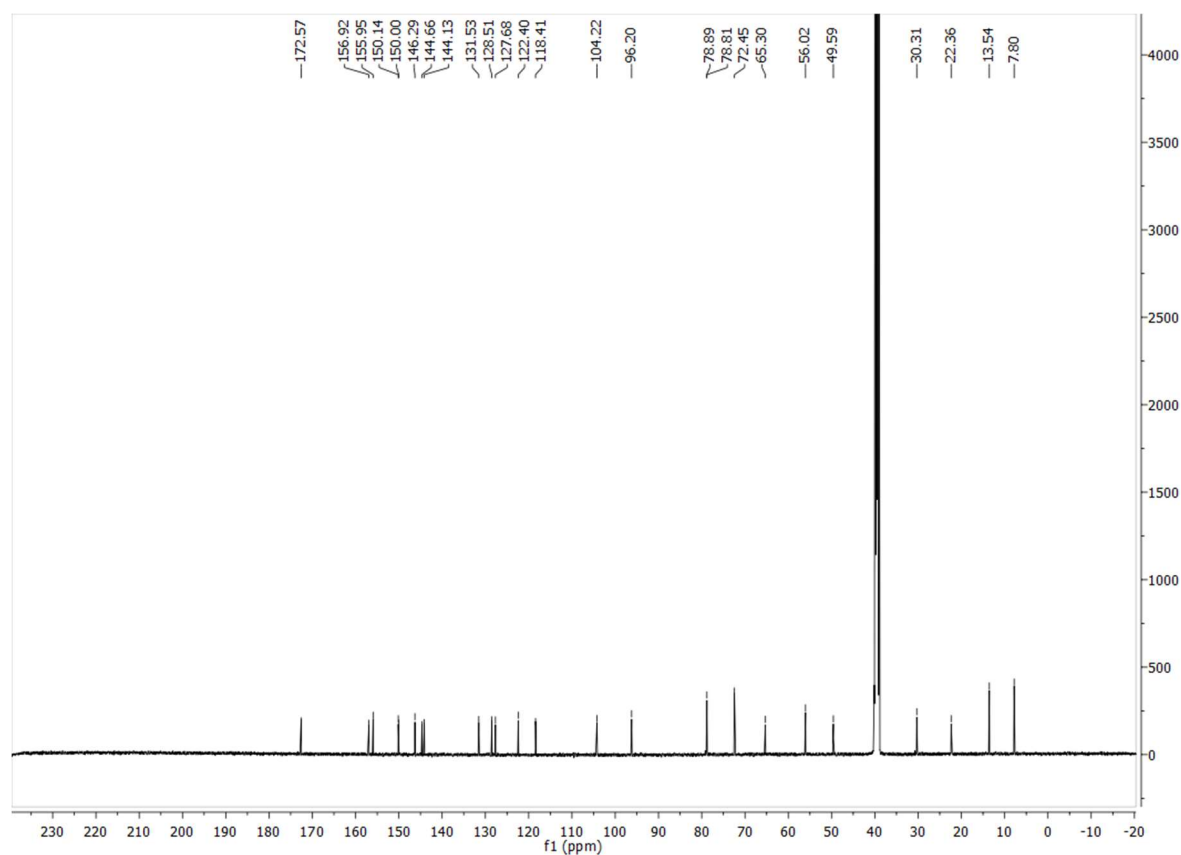

**<sup>1</sup>H NMR spectra of **2b** in DMSO-d<sub>6</sub> at 300 K**

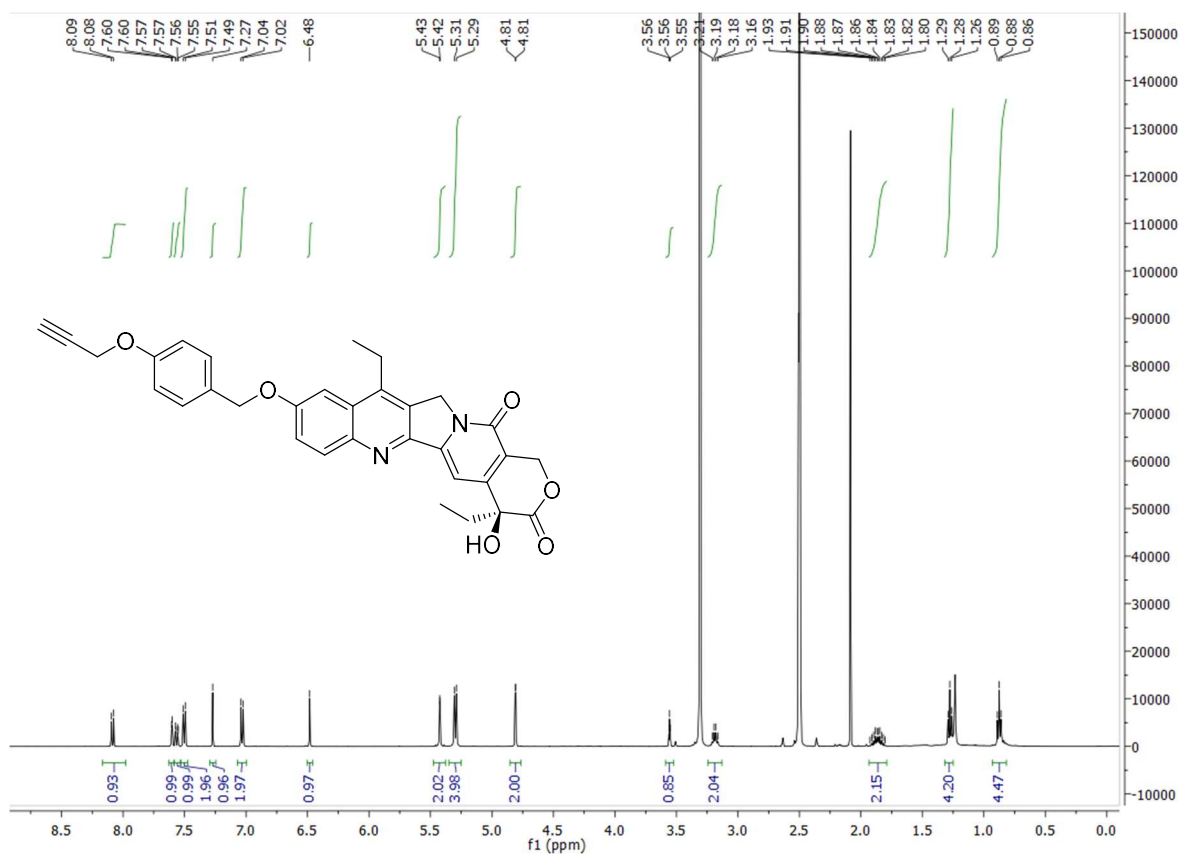

**<sup>13</sup>C NMR spectra of **2b** in DMSO-d<sub>6</sub> at 300 K**

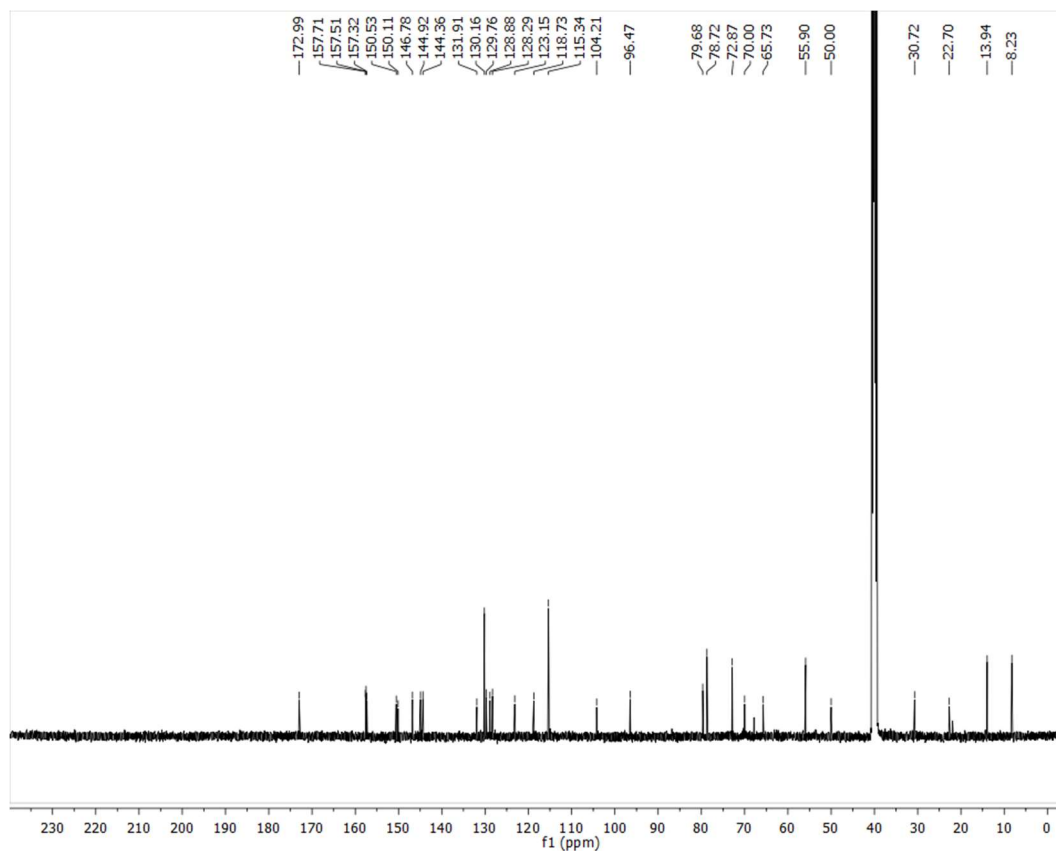



**<sup>1</sup>H NMR spectra of 2c in DMSO-d<sub>6</sub> at 300 K**

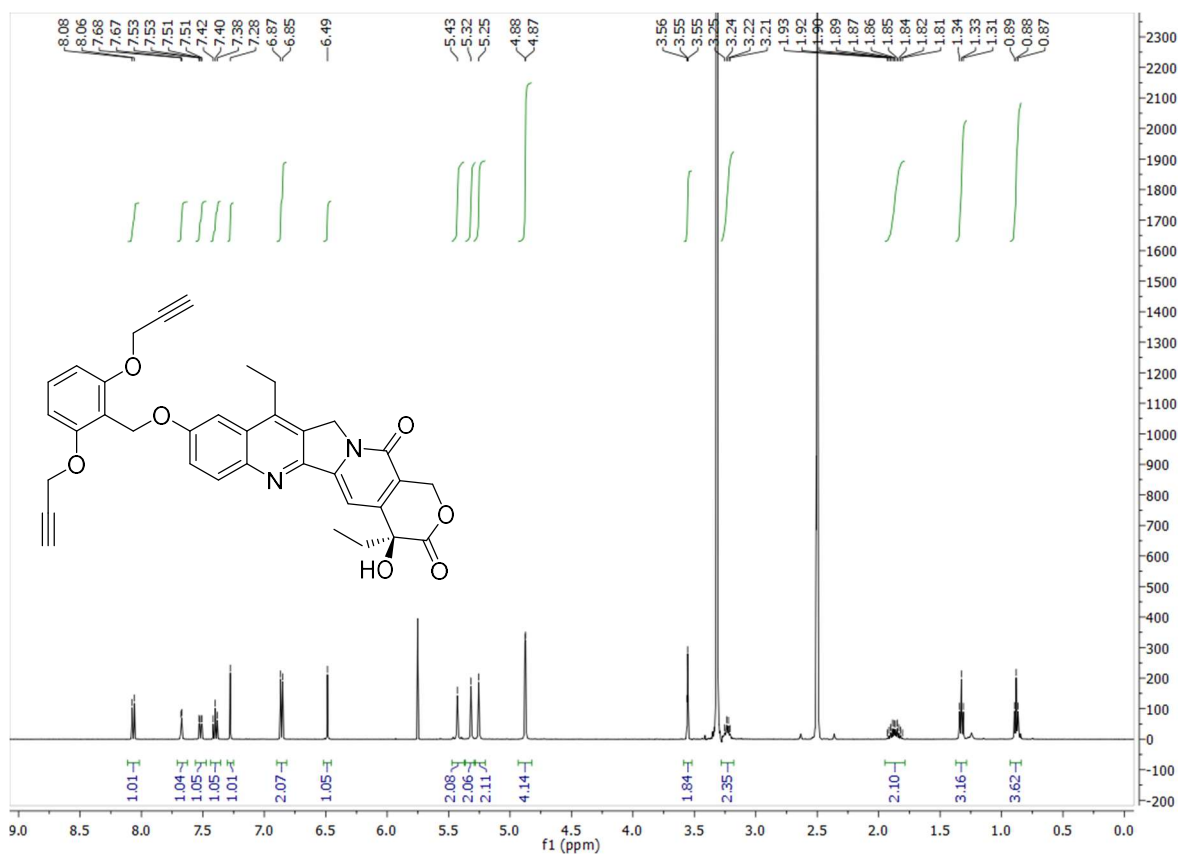

**<sup>13</sup>C NMR spectra of 2c in DMSO-d<sub>6</sub> at 300 K**

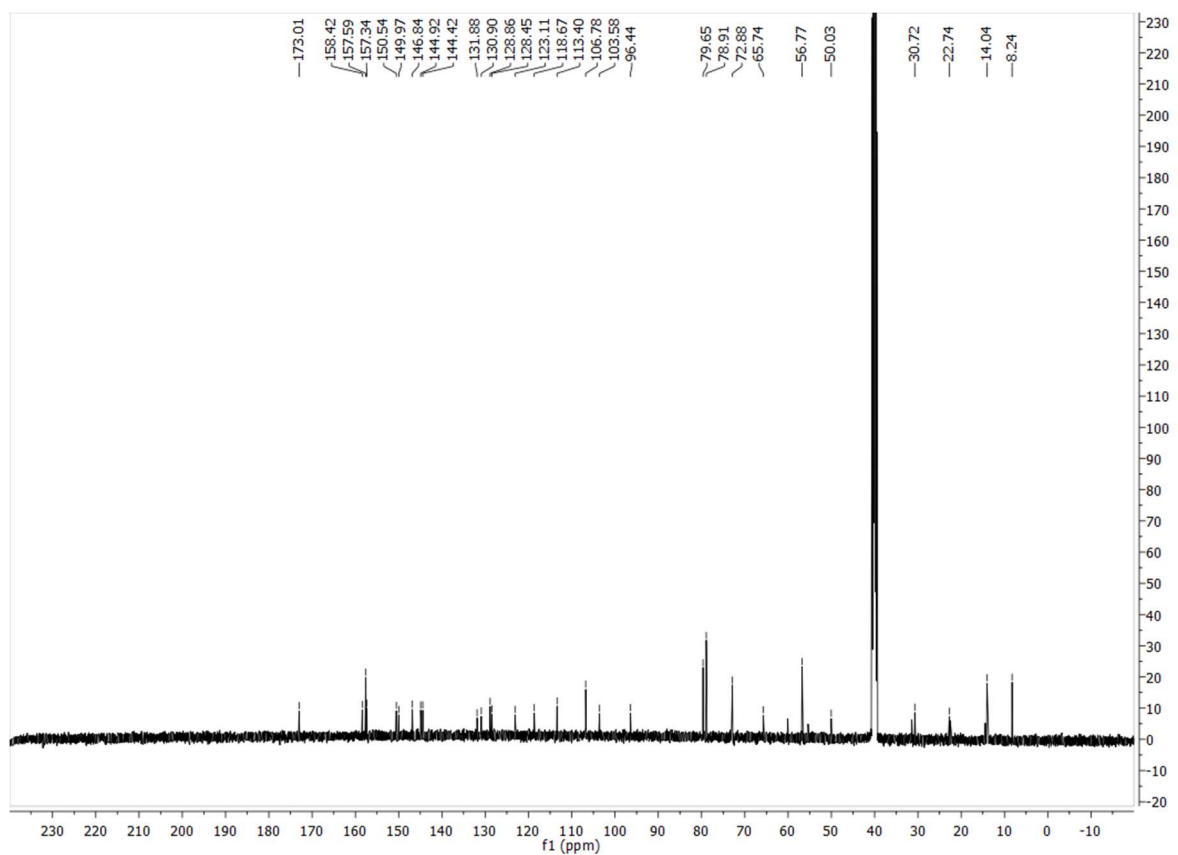

**<sup>1</sup>H NMR spectra of 2d in DMSO-d<sub>6</sub> at 300 K**

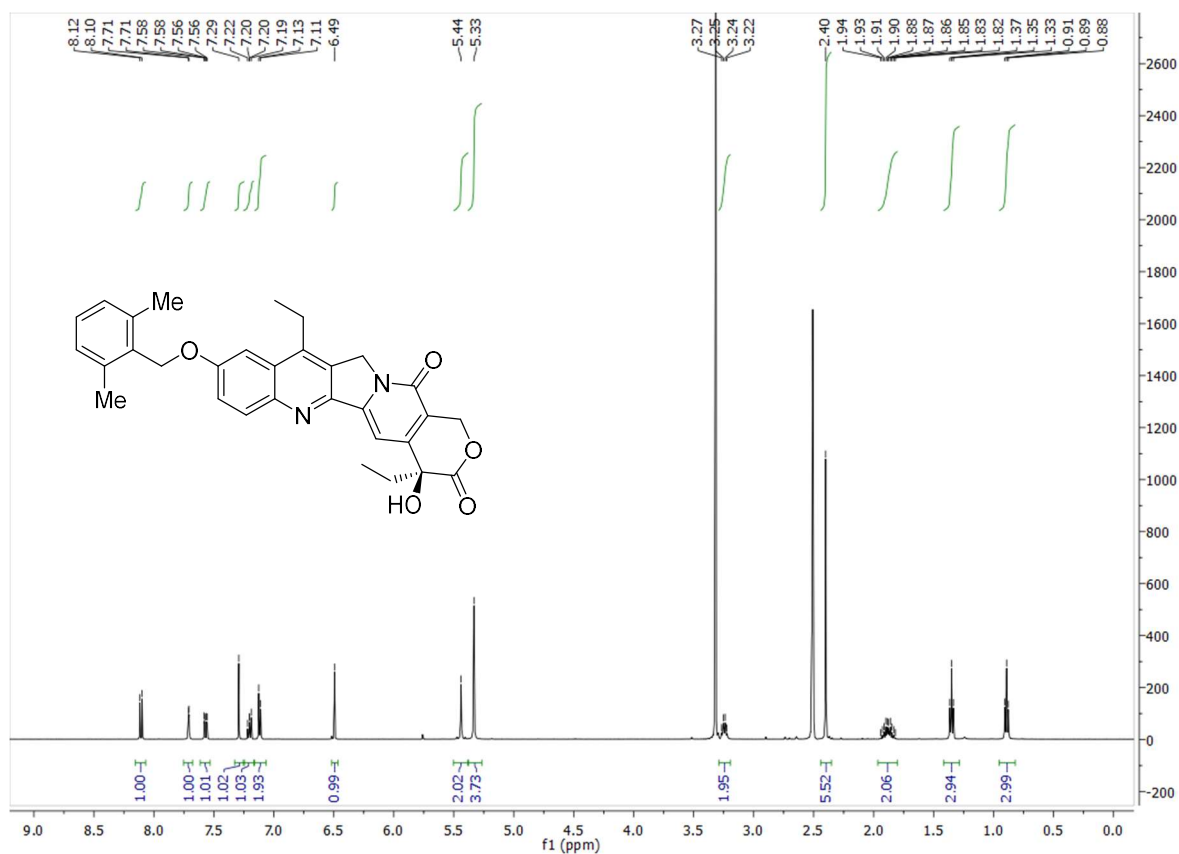

**<sup>13</sup>C NMR spectra of 2d in DMSO-d<sub>6</sub> at 300 K**

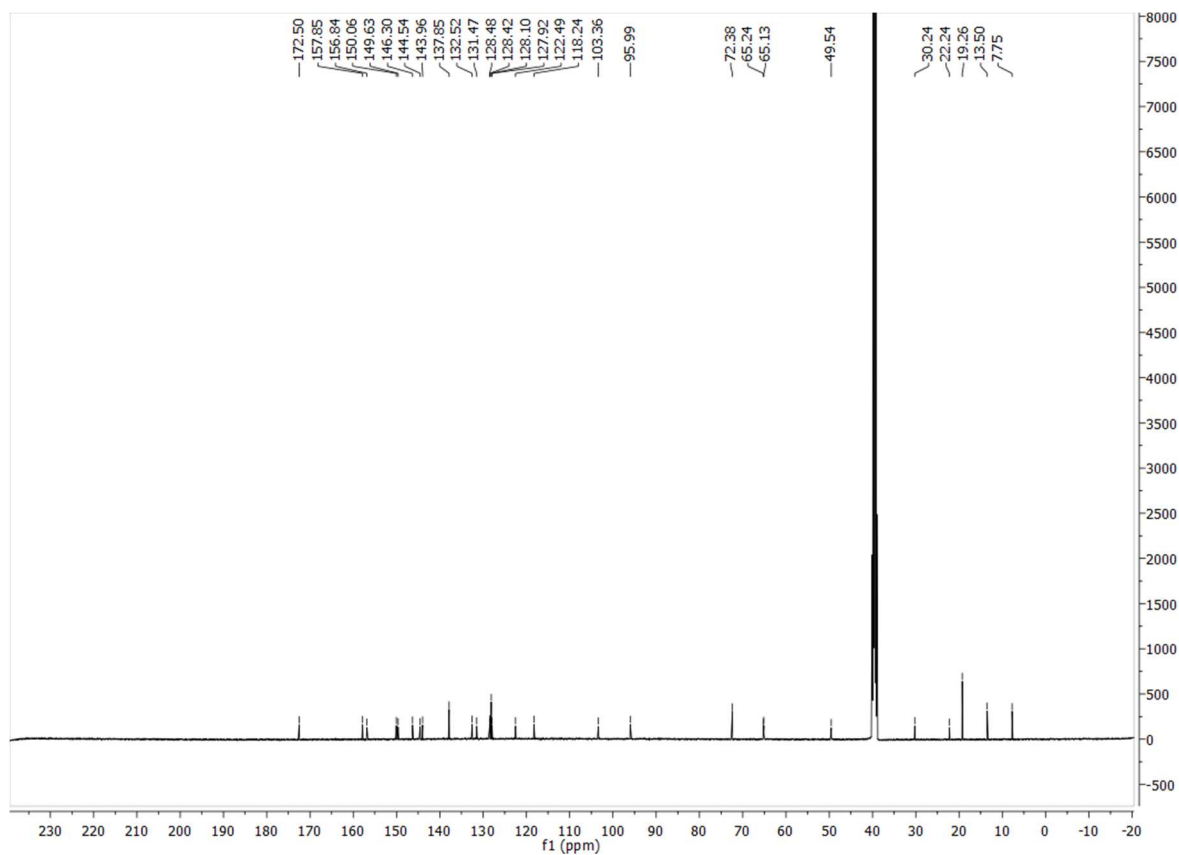

### 3. Synthesis and characterization of Pd-microdevices

NovaSyn TG amino resins HL (1.6 g, 0.24 NH<sub>2</sub> mmol/g, particle size 30 μm) and palladium acetate (263 mg, 1.17 mmol) were added into a 25 mL Biotage microwave vial (Biotage). Next, toluene (10 mL) was added to the vial and heated to 80 °C for 10 min, then stirred at room temperature for an additional 2 h. The resins were filtered and washed with CH<sub>2</sub>Cl<sub>2</sub> (5 x 20 mL) and MeOH (5 x 20 mL). Resins were dispersed in 10 % hydrazine monohydrate in MeOH (10 mL) and stirred at room temperature for 25 min. The resins were again filtered and washed with MeOH (5 x 20 mL) and CH<sub>2</sub>Cl<sub>2</sub> (5x 20 mL). Resins were added to a solution of Fmoc-Glu(OH)-OH (216 mg, 0.59 mmol), Oxyma (166 mg, 1.17 mmol), *N,N*-diisopropylcarbodiimide (DIC) (143 μL, 1.17 mmol) with CH<sub>2</sub>Cl<sub>2</sub>/DMF (2:1, 9 mL) and stirred for 2 h at rt. The resins were filtered and washed with CH<sub>2</sub>Cl<sub>2</sub> (5 x 20 mL), MeOH (5 x 20 mL) and water (5 x 20 mL). Finally, resins were dispersed and shaken in a solution of acetic anhydride (60 μL) in DCM (10 mL) for 1 h at rt. The solvents were filtered and the resins were washed with CH<sub>2</sub>Cl<sub>2</sub> (3 × 10 mL) and methanol (3 × 10 mL) and dried under vacuum at 40 °C for 3 d. Completed coupling was verified by ninhydrin test after the final MeOH wash.

### 4. Non-biological conversion studies in vitro

Stock solutions of **2c**, **2d** (-ve control) and **1** (+ve control) at 100 μM in 10% v/v serum/PBS (1000-fold dilution from 100 mM DMSO stock solution) were added to Eppendorf microcentrifuge tubes containing: a) no resins (control experiment); b) 1 mg/mL of 30 μm NovaSyn TG amino resins HL (aka naked beads, control experiment); and c) 1 mg/mL of Pd-devices as synthesized in section 3. Vials were incubated 37 °C and shaken at 1200 rpm. **Fluorescence Analysis:** 3 × 2 μL aliquots of each reaction solution were analysed at regular intervals. Measurements were recorded on a *Thermo Scientific™ NanoDrop 2000 UV-Vis spectrophotometer* using an excitation wavelength of 365 nm and recording emission between 395-751 nm wavelengths. The data (average of three measurements for each data point) was fit to a one phase decay equation:  $Y=(Y_0 - \text{Plateau}) \times \exp(-K \times X) + \text{Plateau}$ , setting Y<sub>0</sub> to 0, using *GraphPad Prism 5*. **TLC Analysis:** 250 μL aliquots of each reaction solution were taken after 1 d, centrifuged to separate the resins, and the supernatant removed and dried (freeze dryer, overnight). The resulting solid was re-suspended in 5% MeOH / CH<sub>2</sub>Cl<sub>2</sub> (60 μL), sonicated and centrifuged. The TLC of the supernatant (5% MeOH / CH<sub>2</sub>Cl<sub>2</sub>) was visualized with a 254 nm UV lamp. **HPLC Analysis:** 250 μL aliquots of each reaction solution were taken after 1 d, centrifuged to separate the devices, and the supernatant removed and dried (freeze dryer, overnight). The resulting solid was re-suspended in 250 μL MeOH, centrifuged and analysed. **Column conditions:** Retention times were recorded by analytical reverse phase HPLC analysis using a Waters 600E (100 μL) gradient pump using a 717plus

autosampler and a Waters 996 PDA (210 – 400 nm) equipped with a Phenomenex Luna C18(2), 5  $\mu$ m, 250 x 4.6 mm column at a flow rate of 1 mL / min with an injection volume of 10  $\mu$ L. **Gradient elution:**

| Time (min) | % H <sub>2</sub> O + 0.1% TFA | % MeCN + 0.1% TFA |
|------------|-------------------------------|-------------------|
| 0          | 95                            | 5                 |
| 30         | 5                             | 95                |
| 35         | 5                             | 95                |
| 40         | 95                            | 5                 |
| 50         | 95                            | 5                 |

## 5. Cell culture

Cell lines were grown in culture media supplemented with 10% Fetal Bovine Serum (FBS) and 2 mM L-glutamine, incubated in a tissue culture incubator at 37 °C and 5% CO<sub>2</sub>. Human colorectal cancer (HCT116) were cultured in McCoy's 5A medium and human glioblastoma multiforme U-87 (gifted from Dr Noor Gamon) and U-251 cells were cultured in Dulbecco's modified Eagle's media (DMEM).

### Cytotoxicity dose-response curves

Cells were seeded in a 96 well plate format at 1500 (HCT116) or 2000 (U-87 and U-251) cells / well and incubated for 48 h before treatment. Each well was then replaced with fresh media (95  $\mu$ L) followed by the compound of interest (5  $\mu$ L in 2% v/v DMSO/ medium at 20 $\times$  the final concentration). Control wells incubated with DMSO (0.1 % v/v). Cells were then incubated 5 d. Cell viability was measured on day 5 by adding PrestoBlue<sup>®</sup> cell viability reagent (10  $\mu$ L) to each well and incubating for 90 min. Fluorescence emission was detected using a PerkinElmer EnVision 2101 multilabel reader (Ex / Em: 540 nm / 590 nm). All conditions were normalized to control wells (100%) and curves fitted with *GraphPad Prism 5* using a sigmoidal variable slope curve. Plates were repeated in triplicate for each compound.

### Prodrug-into-drug conversion studies – monotherapy activation

Cells were plated as described and incubated for 48 h prior to treatment. Each well was then replaced with fresh media (95  $\mu$ L) or fresh media containing Pd-devices (95  $\mu$ L plus 0.1 mg devices) for prodrug activation wells. The compound of interest (5  $\mu$ L in 2% v/v DMSO/ medium at 20 $\times$  the final concentration). Control wells incubated with DMSO (0.1 % v/v), with 1 mg/mL Pd-resins for Pd control wells. All cells were incubated for 5 d and cell viability was measured as before. Plates were repeated in triplicate for each experiment.

### Prodrug-into-drug conversion studies – dual therapy activation

Cells were plated as described and incubated for 48 h prior to treatment. Each well was then replaced with fresh media (90  $\mu$ L) or fresh media containing Pd-devices (90  $\mu$ L plus 0.1 mg devices) for pro-drug

activation wells. **5FU** / **Pro-5FU** were added to relevant wells (5  $\mu$ L in 2% v/v DMSO / medium at 20 $\times$  the final concentration) followed by **1** / **2c** for relevant wells (5  $\mu$ L in 2% v/v DMSO / medium at 20 $\times$  the final concentration). Control wells with only one drug / prodrug were topped up to the correct volume (5  $\mu$ L of 2% v/v DMSO / medium). Control wells incubated with DMSO (0.2 % v/v), with 1 mg/mL Pd-devices for Pd control wells. All cells were incubated for 5 d and cell viability was measured as before. To ensure appropriate controls, each combination activation assay plate had the following wells in triplicate: DMSO (0.1% v/v); Pd-devices (1 mg/mL); Pro-5FU alone (100  $\mu$ M); **2c** alone (10 or 100 nM for HCT116 and U-87 respectively); 5FU alone (30 and 100  $\mu$ M); **1** alone (10 or 100 nM for HCT116 and U-87 respectively); Pro-5FU+**2c** combination (100  $\mu$ M Pro-5FU + 10 or 100 nM **2c** for HCT116 and U-87 respectively); 5FU+**1** (30 and 100  $\mu$ M 5FU + 10 or 100 nM **1** for HCT116 and U-87 respectively); and Pro-5FU+**2c**+Pd-devices combination activation assay (30 and 100  $\mu$ M Pro-5FU + 10 or 100 nM **2c** for HCT116 and U-87 respectively). Plates were repeated in triplicate for each experiment.

#### Prodrug-into-drug conversion studies – delayed dual therapy activation

Cells were plated as described above and incubated for 48 h prior to treatment. Each well was then replaced with fresh media (90  $\mu$ L) or fresh media containing Pd-devices (90  $\mu$ L + 0.1 mg devices) for prodrug activation wells. Cells were then treated with both drugs (**1** + 5FU) or both prodrugs (**2c** + Pro-5FU) on day 1, **or** two days apart (*i.e.* one treatment of either **1/2c or** 5FU/Pro-5FU on day 1 and the second treatment on day 3). Concentrations of treatments remained constant at: [**1**] and [**2c**] = 300 nM, [5FU] and [Pro-5FU] = 100  $\mu$ M. Control wells with plus 0.2% v/v DMSO were also treated simultaneously or two days apart. Cell viability was measured on day 5 as before.

**Table S1: Calculated EC<sub>50</sub>  $\pm$ SD values for all cell lines / nM**

|                                            | HCT116         | EC <sub>50</sub> /EC <sub>50 1</sub> | U-87            | EC <sub>50</sub> /EC <sub>50 1</sub> | U-251          | EC <sub>50</sub> /EC <sub>50 1</sub> |
|--------------------------------------------|----------------|--------------------------------------|-----------------|--------------------------------------|----------------|--------------------------------------|
| Topotecan                                  | 75 $\pm$ 8.6   | 39                                   | 125 $\pm$ 67    | 1.3                                  | 21 $\pm$ 3.6   | 4                                    |
| Irinotecan                                 | 1855 $\pm$ 650 | 957                                  | 7637 $\pm$ 3005 | 81                                   | 1672 $\pm$ 350 | 286                                  |
| SN-38 ( <b>1</b> )                         | 1.9 $\pm$ 0.35 | 1                                    | 94 $\pm$ 71     | 1                                    | 5.8 $\pm$ 1.3  | 1                                    |
| <b>2a</b>                                  | 5.1 $\pm$ 2.5  | 3                                    | 63 $\pm$ 45     | 1                                    | 12 $\pm$ 1.9   | 2                                    |
| <b>2b</b>                                  | 16 $\pm$ 8.8   | 9                                    | 123 $\pm$ 51    | 1                                    | 22 $\pm$ 7.6   | 4                                    |
| <b>2c</b>                                  | 84 $\pm$ 13    | 43                                   | 1466 $\pm$ 1052 | 16                                   | 205 $\pm$ 6.1  | 35                                   |
| <b>2d</b>                                  | 104 $\pm$ 32   | 54                                   | 603 $\pm$ 420   | 6                                    | 92 $\pm$ 11    | 16                                   |
| 5FU ( $\mu$ M)                             | 2.4 $\pm$ 0.61 | -                                    | 20 $\pm$ 34     | -                                    | 28 $\pm$ 6.1   | -                                    |
| pro5FU ( $\mu$ M)                          | >100           | -                                    | >100            | -                                    | >100           | -                                    |
| Co-treatment <b>2c</b> + pro5FU ( $\mu$ M) | >100           | -                                    | >100            | -                                    | >100           | -                                    |

## 6. Supplementary Figures

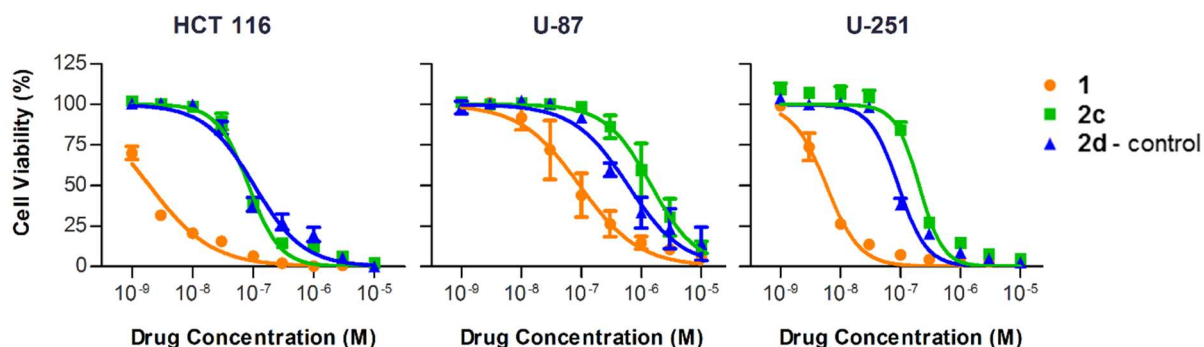

**Figure S1.** Half-log dose response curves for **1** compared to prodrugs **2c** and **2d** (control) after a 5 d incubation with HCT116, U-87 and U-251 cells. Error bars:  $\pm$  SEM,  $n = 3$ .

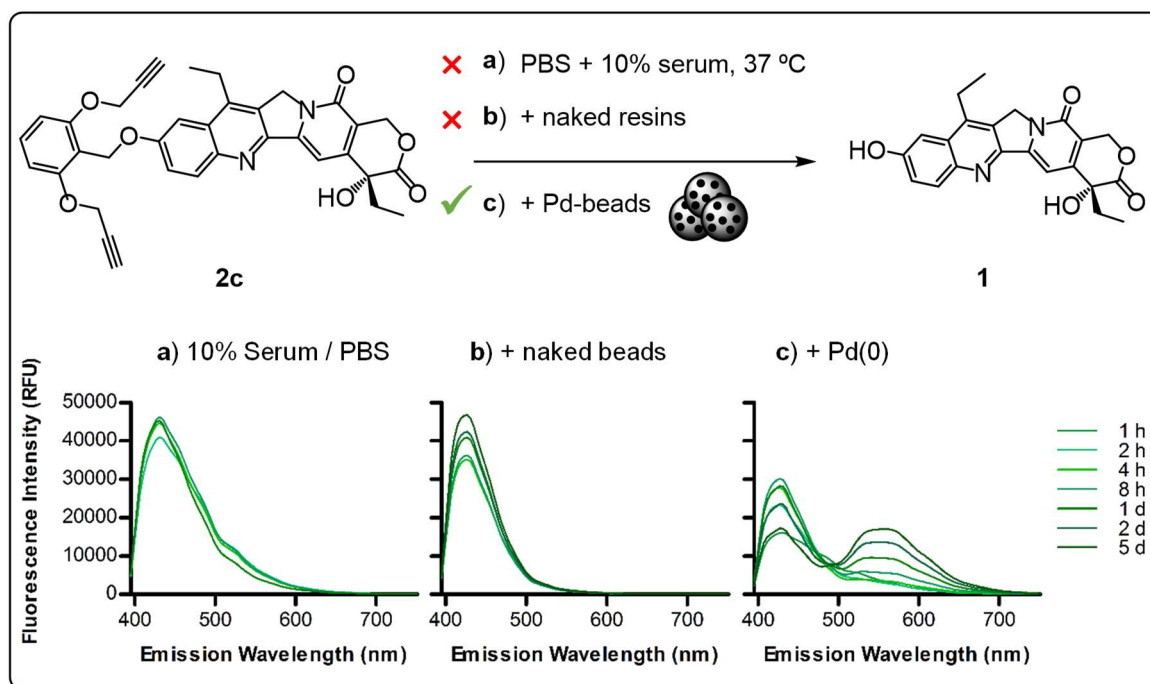

**Figure S2.** Control experiments: (a) Fluorescence monitoring of **2c** without beads under biological conditions (100  $\mu$ M in PBS + 10% serum, 37 °C). (b) Fluorescence monitoring of **2c** with naked beads under biological conditions (100  $\mu$ M in PBS + 10% serum, 37 °C, 1 mg/mL naked beads). Activation assay: (c) Fluorescence monitoring of **2c** with Pd-devices under biological conditions (100  $\mu$ M in PBS + 10% serum, 37 °C, 1 mg/mL Pd-devices).

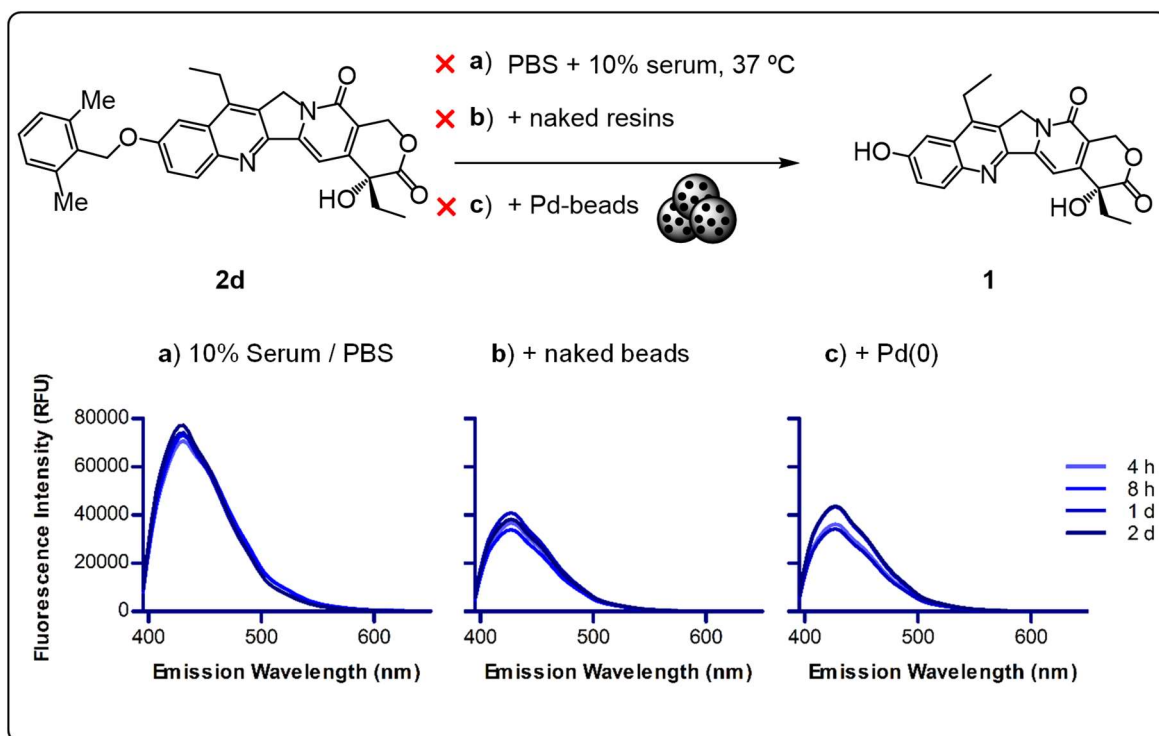

**Figure S3. Control experiments:** (a) Fluorescence monitoring of **2d** without beads under biological conditions (100  $\mu$ M in PBS + 10% serum, 37 °C). (b) Fluorescence monitoring of **2d** with naked beads under biological conditions (100  $\mu$ M in PBS + 10% serum, 37 °C, 1 mg/mL naked beads). (c) Fluorescence monitoring of **2d** with Pd-devices under biological conditions (100  $\mu$ M in PBS + 10% serum, 37 °C, 1 mg/mL Pd-devices) .

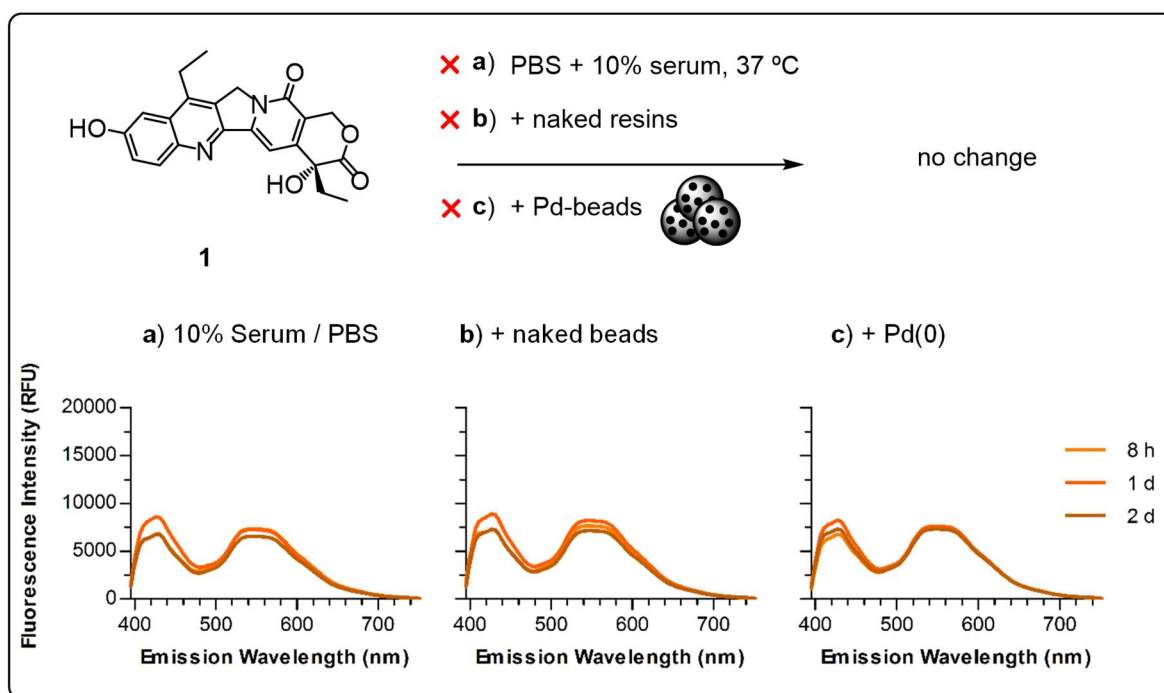

**Figure S4.** Control experiments: (a) Fluorescence monitoring of **1** without beads under biological conditions (100  $\mu$ M in PBS + 10% serum, 37 °C). (b) Fluorescence monitoring of **1** with naked beads under biological conditions (100  $\mu$ M in PBS + 10% serum, 37 °C, 1 mg/mL naked beads). (c) Fluorescence monitoring of **1** with Pd-devices under biological conditions (100  $\mu$ M in PBS + 10% serum, 37 °C, 1 mg/mL Pd-devices).



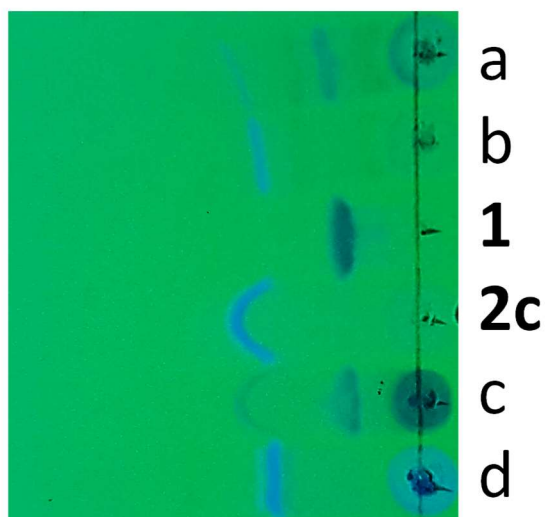

**Figure S5.** TLC analysis of reaction mixture **2c** + Pd-devices after 1 d at 37 °C - referenced to **1** and **2c** (middle). Conditions: **a**) 100  $\mu\text{M}$  **2c** in PBS + 1 mg/mL Pd-devices. **b**) *Control Experiment (no beads)* 100  $\mu\text{M}$  **2c** in PBS. **c**) 100  $\mu\text{M}$  **2c** in 10% v/v serum / PBS + 1 mg/mL Pd-devices. **d**) *Control Experiment (no beads)* 100  $\mu\text{M}$  **2c** in 10% v/v serum / PBS.

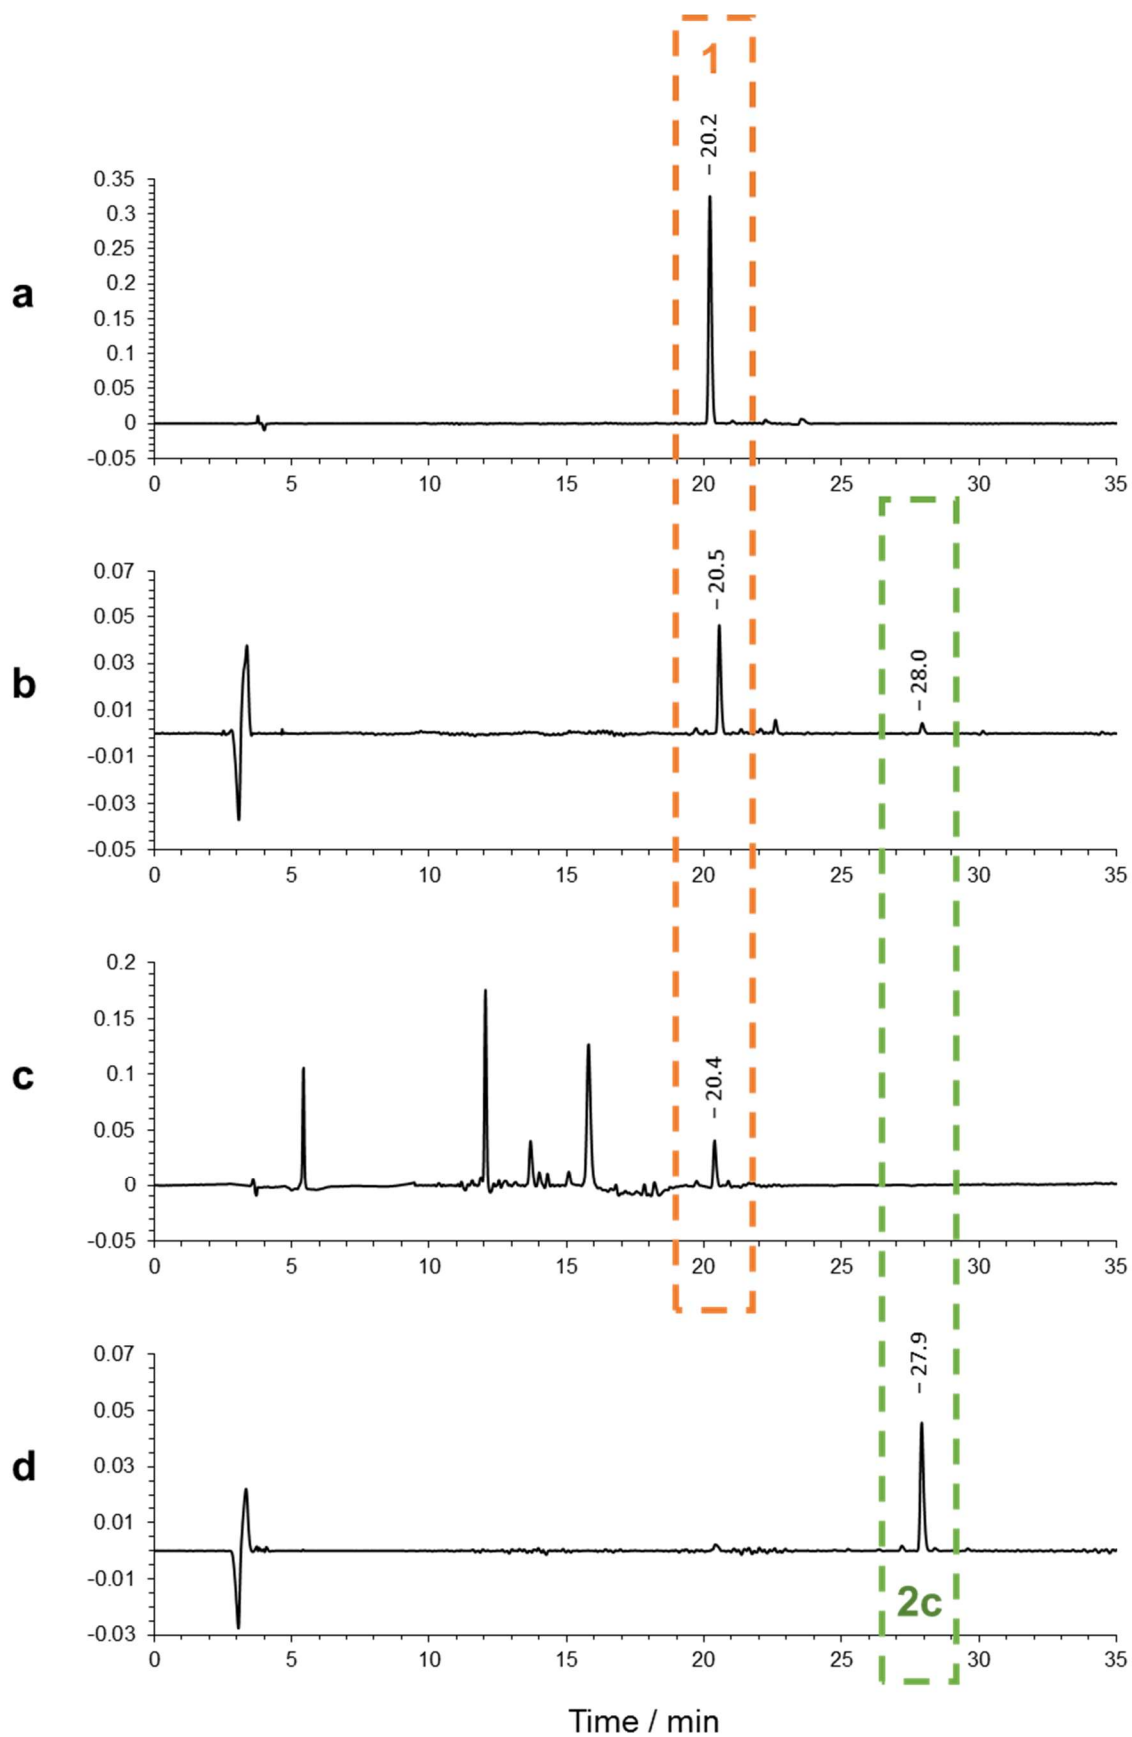

**Figure S6.** HPLC traces (UV detector 220 nm) of: **a)** Compound **1**, 300  $\mu\text{M}$  in MeOH. **b)** Reaction mixture of **2c** + 1 mg/mL Pd-devices in PBS, 37  $^{\circ}\text{C}$ , 24 h, 1200 rpm. **c)** Reaction mixture of **2c** + 1 mg/mL Pd-devices in PBS/10% serum, 37  $^{\circ}\text{C}$ , 24 h, 1200 rpm. **d)** **2c** Compound **2c**, 200  $\mu\text{M}$  in MeOH.

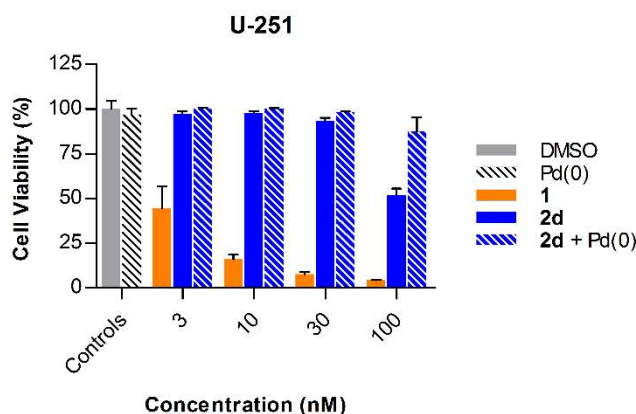

**Figure S7.** Control experiment: Pd-devices + **2d** at nM concentrations in U-251 cells. Experiments: 0.1% (v/v) DMSO (control); 1 mg/mL of Pd-devices (–ve control); **1** (+ve control); **2d** (–ve control); 1 mg/mL of Pd-devices + **2d** (activation control assay). Cell viability was measured at day 5 using PrestoBlue reagent. Error bars:  $\pm$  SEM, n = 3.

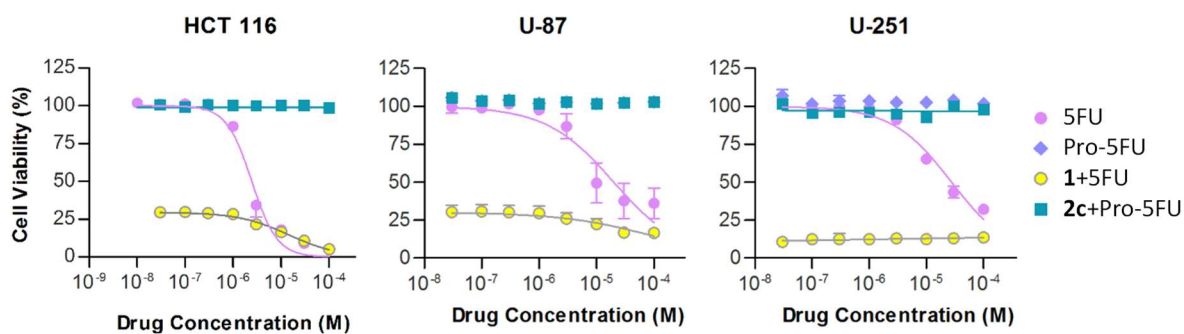

**Figure S8.** Dose-response curves for 5FU, Pro-5FU, **1**+5FU combination and **2c**+Pro-5FU combination. Concentration of **1** / **2c** remained constant at 10 nM for HCT116, 100 nM for U-87 and 30 nM for U-251 as the concentration of 5FU / pro-5FU was varied. See **Table S1** for calculated  $EC_{50}$ . For dose-response curve fitting of **1** + **5FU** combination, sigmoidal dose-response (variable slope) was used, constraining HCT116 to 29.4%; U-87 to 30.1%; and U-251 to 11.9% as the top responses for each cell line. Error bars:  $\pm$  SEM, n = 3.

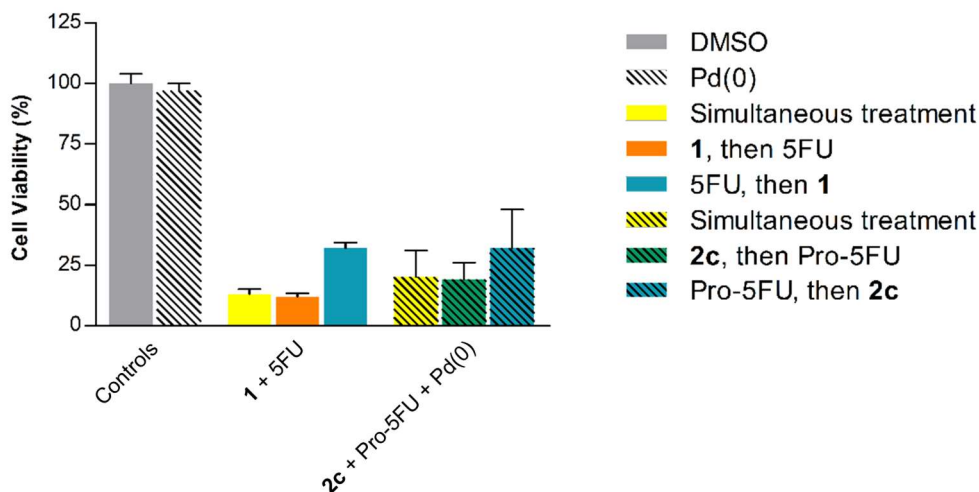

**Figure S9.** Simultaneous vs sequential co-activation of **2c** and Pro-5FU in U-87 cancer cell culture with Pd-microdevices. The day of treating cells with drug / prodrug were varied, while concentrations remained constant at: [**1**] and [**2c**] = 300 nM, [5FU and [Pro-5FU] = 100  $\mu$ M. Controls: 0.1% (v/v) DMSO (control, grey); 1 mg/mL of Pd-devices (–ve control, black stripes); **1** + 5FU (both added on day 1, yellow); **1** (added on day 1) + 5FU (added on day 3, orange); 5FU (added on day 1, blue) + **1** (added on day 3). Experiments: 1 mg/mL of Pd-devices + **2c** + Pro-5FU (both added on day 1, yellow with black stripes); 1 mg/mL of Pd-devices +**2c** (added on day 1) + Pro-5FU (added on day 3, green with black stripes); 1 mg/mL of Pd-devices + Pro-5FU (added on day 1, blue with black stripes) + **2c** (added on day 3). Error bars:  $\pm$  SEM.

## 7. References

- [1] B. Rubio-Ruiz, J. T. Weiss, A. Unciti-Broceta, *J. Med. Chem.* **2016**, *59*, 9974-9980.  
 [2] L. De Luca, G. Giacomelli, A. Porcheddu, *Org. Lett.* **2002**, *4*, 553-555.
